# Supplementary material
Source: PubMed Central journal article supplement (PMC2790571)
Supplement: mmc1.pdf [file mmc1.pdf]

**Supplemental Data**  
**AJHG, Volume 85**

**Identification of Mutations in *TRAPPC9*, which Encodes the NIK and IKK- $\beta$  Binding Protein, in Nonsyndromic Autosomal Recessive Mental Retardation**

Asif Mir, Liana Kaufman, Abdul Noor, Mahdi M. Motazacker, Talal Jamil, Matloob Azam, Kimia Kahrizi, Muhammad Arshad Rafiq, Rosanna Weksberg, Tanveer Nasr, Farooq Naeem, Andreas Tzschach, Andreas W. Kuss, Gisele E. Ishak, Dan Doherty, H. Hilger Ropers, A. James Barkovich, Hossein Najmabadi, Muhammad Ayub, and John B. Vincent

Table S1. Primers for *TRAPPC9*. These primers were used to amplify TRAPPC9 from the genomic DNA of family members. All primers are shown in 5' to 3' direction.

| Exon     | Forward Primer             | Reverse Primer             | Size  |
|----------|----------------------------|----------------------------|-------|
| Exon 1   | CGCCTTGGCACTGAACTAAC       | GAGGAAAGCTTCTGCACCTG       | 450bp |
| Exon 2   | GGGTAGGCTCTCAGCACTCA       | CGGGAGTCATACAGTGTGGA       | 412bp |
| Exon 2-2 | CCATCACAGACTGCTTCTCG       | TTGCTGCAATGAAATTCTGC       | 421bp |
| Exon 2-3 | CAAATGAGCGTCCCTGACT        | TCTTGTCTGTGGCTCTGTCCA      | 515bp |
| Exon 3   | GAGAATTGAATAGTGCTTAGTCAGAG | GCACCCAGCCTCTCATTTTA       | 300bp |
| Exon 4   | GCTAATGAAGGGTCACTGACTTG    | TCCTAACTCAAAGGAAAAGTAACAAA | 303bp |
| Exon 5   | CAAGTCAGATTTTTCTCTAGGCTATG | GGACCCACCAATCAATCATC       | 304bp |
| Exon 6   | CATGCTCCTCTTTAACAAGAAA     | TGCATTAGAGAGCAAGACATGAA    | 330bp |
| Exon 7   | ATGGGGGAAGTGCTGTTGTA       | TTATCATGGCATGCTGAACC       | 344bp |
| Exon 8   | CAGGTCTTTGTTTTATGAAGAGACA  | CAGGGCAGGGATCTAGTCAT       | 447bp |
| Exon 9   | GTTTGGTGGTTGAGGCATCT       | CAAGCCCAGGGTTTACATGA       | 344bp |
| Exon 10  | AATGAAAGCCAGCCACTTTG       | CCGATACACAGCCAACAAA        | 307bp |
| Exon 11  | ATCCTGAAACCACGCTAACC       | ACATGCATGAACTGGCTCAA       | 304bp |
| Exon 12  | TGCCAGAGGAATAATTGGAAA      | TCGTAAGATGTGTGCCTCAGA      | 265bp |
| Exon 13  | TGTGCCATAGCCAATGTCTT       | AACTGGTTAGGACTGGCATGA      | 325bp |
| Exon 14  | GAAGAGGAGCCCCGTACTCT       | TTACAGGCTCTTTGTGCCATT      | 321bp |
| Exon 15  | TGGTGATTCTTCTTTGGGAAG      | CTGACTTCAACTGAATCCACAAA    | 374bp |
| Exon 16  | GGGGATTGGTAAGTCCCATA       | ACAAAGTGCCAGGAGATGT        | 367bp |
| Exon 17  | CAAAGGTTGCAGTGAGCAGA       | ACCAAACAATGCACTCAAGC       | 458bp |
| Exon 18  | GCCTCCTGGTGGATCAAAC        | ACGGGATGCATGACAAAAC        | 310bp |
| Exon 19  | AAGTGGTGGGAAGTCTTTGG       | TGAGGACTTGGGGTGGATTA       | 300bp |
| Exon 20  | TGAAGTCAGGGCCACCTTAG       | GTGGGGCCTTTGAAGTGTTA       | 517bp |
| Exon 21  | CCCATCTGAGGGTCTCTGTC       | TTCCCGTGATGACCTTCAGT       | 309bp |
| Exon 22  | CACACATCTGTGTCCCCAGT       | CACATTTTCCTGCTTCACCA       | 623bp |
| Exon 23  | CCTATGTCCAGGCAGATTCC       | CAGTGAAGGCCTTGCTCATT       | 348bp |

Table S2. Primers used for quantitative PCR to determine relative expression of *TRAPPC9* in normal versus affected individuals. Primers for *TRAPPC9* and *HPRT1*, our internal control are shown. Primers are shown in 5' to 3' direction.

| Gene    | Exon               | Forward Primer           | Reverse Primer         | Size  |
|---------|--------------------|--------------------------|------------------------|-------|
| TRAPPC9 | Spans Exon 2 and 3 | GATAAGATCCCCCTTCTCTGTGTC | CTTGGCACCGCTTCTTGTAAT  | 91bp  |
| HPRT    | Spans Exons 6-8    | TGGTCAGGCAGTATAATCCAAA   | TCAAGGGCATATCCTACAACAA | 136bp |
